# Supplementary material
Source: Springer Nature journal article supplement (https://www.springermedizin.de/resource/supplementary/12888_2014_1654_MOESM6_ESM.pdf/9481114)

**A**

R

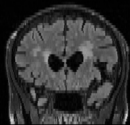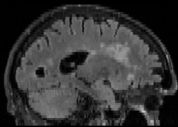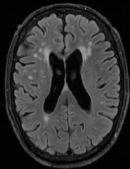

L

**B**

R

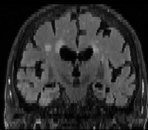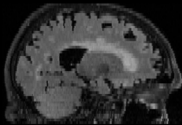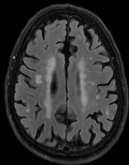

L

**C**

R

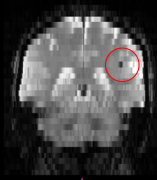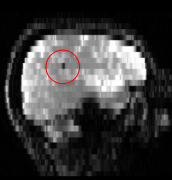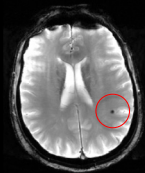

L

Supplement: MOESM6 [file 9481114]
